# Supplementary material for: Long-Term Occurrence of Deoxynivalenol in Feed and Feed Raw Materials with a Special Focus on South Korea
Source: Toxins (Basel). 2018 Mar 16;10(3):127. doi: 10.3390/toxins10030127 (PMC5869415; doi:10.3390/toxins10030127)
Supplement: Supplementary file 1 [file toxins-10-00127-s001.pdf]

# Supplementary Materials: Long-Term Occurrence of Deoxynivalenol in Feed and Feed Raw Materials with a Special Focus on South Korea

Juhee Park, Hansub Chang, Dongho Kim, Soohyun Chung and Chan Lee

**Table S1.** Description of compound feeds for cattle.

| Feed Type              | Period for feeding                      |
|------------------------|-----------------------------------------|
| Early breeding calves  | Birth to 3 months                       |
| Middle breeding calves | 3 to 6 months                           |
| Late breeding calves   | 6 to 12 months                          |
| Sire or breeding bull  | After 13 months                         |
| Gestating beef         | 13 months to farrowing                  |
| Lactating beef         | Farrowing to 3 months after birth       |
| Early beef calves      | Before 3 months                         |
| Middle beef calves     | After 3 months to 250 kg of body weight |
| Early beef cattle      | 250 kg to 400 kg of body weight         |
| Middle beef cattle     | 400 kg to 500 kg of body weight         |
| Late beef cattle       | Over 500 kg of body weight              |

**Table S2.** Description of compound feeds for swine.

| Feed Type              | Period for feeding                                                  |
|------------------------|---------------------------------------------------------------------|
| Sucking piglets        | Before lactating                                                    |
| Weanling piglets       | Over 5 kg of body weight or after lactating to 20 kg of body weight |
| Early growing pigs     | 20 kg to 50 kg of body weight                                       |
| Late growing pigs      | 50 kg to 80 kg of body weight                                       |
| Growing pigs           | 50 kg or 80 kg of body weight to before the 15th for shipment       |
| Growing-finishing pigs | Before the 15th for shipment to shipment                            |
| Sire, boar             | Over 25 kg of body weight                                           |
| Gilts                  | 25 kg of body weight to before pregnant                             |
| Gestating sows         | Gestating period                                                    |
| Lactating sows         | Lactating period                                                    |

**Table S3.** Description of compound feeds for poultry.

| Feed Type             | Period for feeding                           |
|-----------------------|----------------------------------------------|
| Early layer chicks    | Before 6 to 10 weeks                         |
| Middle layer chicks   | 6 to 12 weeks or 2 weeks before laying       |
| Late layer chicks     | 12 weeks to 2 weeks before laying            |
| Early broiler chicks  | 3 weeks or before 6 weeks                    |
| Middle broiler chicks | 3 weeks or 6 weeks to before laying          |
| Before laying         | 2 weeks before laying to laying commencement |
| Early laying          | Laying commencement to 40 weeks              |
| Middle laying         | 40 weeks to 65 weeks                         |
| Late laying           | After 65 weeks                               |
| Breeding broiler      | Layer breeder or broiler breeder             |
| Early broiler         | Before 3 weeks                               |
| Middle broiler        | 3 weeks to before the 7–10th before shipment |
| Finishing broiler     | After the 7–10th before shipment to shipment |

**Table S4.** Description of compound feeds for dairy cows.

| Feed Type                     | Period for feeding                                                     |
|-------------------------------|------------------------------------------------------------------------|
| Early dairy calves            | Birth to 3 months                                                      |
| Middle dairy calves           | 3 months to 6 months                                                   |
| Late dairy calves             | 6 months to before pregnancy                                           |
| Gestating dairy cows          | Pregnancy to 2 months after farrowing                                  |
| Dairy sires                   | After 13 months                                                        |
| Dairy cows in early lactation | After farrowing to lactation 3 months (31 to 40 kg of milk production) |
| Dairy cows in mid lactation   | Lactation 3 months to 6 months (21–30 kg of milk production)           |
| Dairy cows in late lactation  | Lactation 6 months to dry period (11–20 kg of milk production)         |
| Dairy cow on dry              | Dry period (Less than 10 kg of milk production)                        |
| High yielding dairy cows      | Over 40 kg of milk production                                          |

**Table S5.** Description of feed ingredients.

| Class                     | Feed type               |
|---------------------------|-------------------------|
| Grains                    | Grains                  |
|                           | Grain products          |
| Grain by-products (Bran)  | Corn gluten feed        |
|                           | Soybean hull            |
|                           | Wheat shorts            |
|                           | Cotton seeds hull       |
|                           | Wheat bran              |
|                           | Corn bran               |
|                           | Other grain by-products |
| Meal (Vegetable proteins) | Soybean meal            |
|                           | Wheat gluten            |
|                           | Corn gluten meal        |
|                           | Corn germ meal          |
|                           | Distillers dried grains |
|                           | Coffee meal             |
|                           | Palm oil meal           |
| Fibrous feed              | Other meal              |
|                           | Fibrous feed            |
| Food by-products          | Food by-products        |
| Beans                     | Beans                   |
| Seed nuts                 | Seed nuts               |
| Mixed formulation         | Mixed formulation       |
